# Supplementary material
Source: Copernicus journal article supplement (doi:10.5194/essd-18-4219-2026)
Supplement: Supplementary file 1 [file essd-18-4219-2026-supplement.pdf]

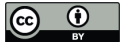

*Supplement of*

## **TPLake-MED: a monthly extent dataset for lakes on the Tibetan Plateau**

**Siyu Zhao et al.**

*Correspondence to:* Xiang Zhao ([zhaoxiang@bnu.edu.cn](mailto:zhaoxiang@bnu.edu.cn))

The copyright of individual parts of the supplement might differ from the article licence.

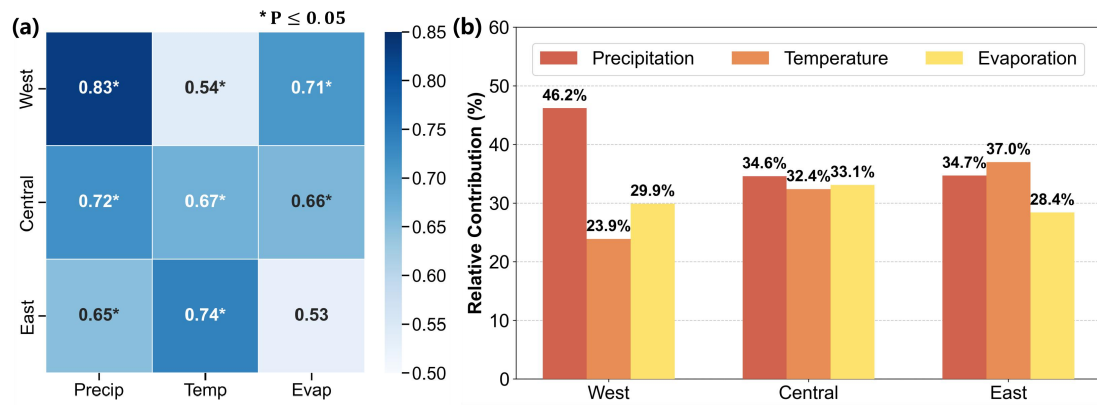

Figure S1: Driving mechanisms of lake area variations across the longitudinal gradient of the Tibetan Plateau. (a) Heatmap of Pearson correlation coefficients ( $r$ ) between monthly lake area and key climate drivers. To account for catchment concentration times, a one month lag was applied to precipitation and temperature, while potential evaporation was considered concurrently. (b) Relative contributions (%) of the three climate drivers to lake area variations, derived from absolute standardized coefficients of multiple linear regression models.
